# Supplementary material for: Synthesis, characterization and theoretical studies of nonlinear optical crystal Sr2B5O9(OH)·H2O
Source: Royal Society of Chemistry journal article supplement (doi:10.1039/c5cp00864f), 2015-01-01
Supplement: c5cp00864f1.pdf [file c5cp00864f1.pdf]

## Supporting Information

### Synthesis, characterization and theoretical studies of the nonlinear optical crystal $\text{Sr}_2\text{B}_5\text{O}_9(\text{OH}) \cdot \text{H}_2\text{O}$

Fangyuan Zhang,<sup>a,b</sup> Fangfang Zhang,<sup>\*b</sup> Qun Jing,<sup>b</sup> Shilie Pan,<sup>\*b</sup> Zhihua Yang<sup>b</sup>  
and Dianzeng Jia<sup>a</sup>

<sup>a</sup> College of Chemistry and Chemical Engineering, Xinjiang University, Urumqi  
830046, China

<sup>b</sup> Key Laboratory of Functional Materials and Devices for Special Environments,  
Xinjiang Technical Institute of Physics and Chemistry, Chinese Academy of Sciences,  
Xinjiang Key Laboratory of Electronic Information Materials and Devices, Urumqi  
830011, China.

\*Corresponding authors, E-mails: ffzhang@ms.xjb.ac.cn, slpan@ms.xjb.ac.cn

### **Single crystal X-ray diffraction measurement**

Single crystal X-ray diffraction data were collected at RT on a Bruker SMART APEX II CCD diffractometer with graphite-monochromatic Mo K $\alpha$  radiation ( $\lambda = 0.71073$  Å). The data were integrated using the SAINT program, and numerical absorption corrections were performed using the SADABS program.<sup>1</sup> The structure was solved by direct method and refined with a full-matrix least-squares technique using programs from the SHELXTL crystallographic software package.<sup>2</sup> Anisotropic thermal parameters were applied to all nonhydrogen atoms. Hydrogen atoms were placed in geometrically idealized positions. The structure was verified using the *Addsym* subroutine of PLATON<sup>3</sup> and no higher symmetries were found.

Table S1. Crystal data and structural refinement for Sr<sub>2</sub>B<sub>5</sub>O<sub>9</sub>(OH) H<sub>2</sub>O at 297K

| formula                                                               | Sr <sub>2</sub> B <sub>5</sub> O <sub>9</sub> (OH) H <sub>2</sub> O |
|-----------------------------------------------------------------------|---------------------------------------------------------------------|
| fw /g·mol <sup>-1</sup>                                               | 408.31                                                              |
| crystal system                                                        | monoclinic                                                          |
| space group                                                           | C2 (No. 5)                                                          |
| <i>a</i> / Å                                                          | 10.2342(15)                                                         |
| <i>b</i> / Å                                                          | 8.0240(13)                                                          |
| <i>c</i> / Å                                                          | 6.3898(9)                                                           |
| $\beta$ / deg                                                         | 127.882(7)                                                          |
| <i>V</i> / Å <sup>3</sup>                                             | 414.15(11)                                                          |
| <i>Z</i>                                                              | 2                                                                   |
| $\rho_{\text{calcd}}$ / g·cm <sup>-3</sup>                            | 3.274                                                               |
| $\mu$ / mm <sup>-1</sup>                                              | 12.938                                                              |
| <i>F</i> (000)                                                        | 384                                                                 |
| crystal size / mm <sup>3</sup>                                        | 0.146 × 0.110 × 0.085                                               |
| $\theta_{\text{max}}$ / deg                                           | 27.45                                                               |
| reflections collected / unique                                        | 2374 / 867                                                          |
| <i>R</i> (int)                                                        | 0.0246                                                              |
| completeness                                                          | 100 %                                                               |
| GOF on <i>F</i> <sup>2</sup>                                          | 0.940                                                               |
| <i>R</i> <sub>1</sub> , <i>wR</i> <sub>2</sub> (I>2σ(I)) <sup>a</sup> | 0.0174, 0.0392                                                      |
| <i>R</i> <sub>1</sub> , <i>wR</i> <sub>2</sub> (all data)             | 0.0183, 0.0395                                                      |
| flack parameter                                                       | 0.006(9)                                                            |

$$^a R_1 = \sum ||F_o| - |F_c|| / \sum |F_o| \text{ and } wR_2 = [\sum w(F_o^2 - F_c^2)^2 / \sum w F_o^4]^{1/2}.$$

Table S2. Atomic coordinates ( $\times 10^4$ ) and equivalent isotropic displacement parameters ( $\text{\AA}^2 \times 10^3$ ) for  $\text{Sr}_2\text{B}_5\text{O}_9(\text{OH}) \cdot \text{H}_2\text{O}$ .  $U_{\text{eq}}$  is defined as one third of the trace of the orthogonalized  $U_{ij}$  tensor.

| Atoms | Wyckoff positions | $x/a$   | $y/b$   | $z/c$    | $U_{\text{eq}}$ | BVS              |
|-------|-------------------|---------|---------|----------|-----------------|------------------|
| Sr1   | 4c                | 7046(1) | 5352(1) | 9147(1)  | 10(1)           | 2.1              |
| B1    | 4c                | 9257(5) | 2504(6) | 7442(7)  | 9(1)            | 3.0              |
| B2    | 2b                | 5000    | 9164(7) | 5000     | 8(1)            | 3.0              |
| B3    | 4c                | 7666(5) | 5038(6) | 5073(8)  | 10(1)           | 3.0              |
| O1    | 4c                | 6466(3) | 6092(3) | 4532(5)  | 9(1)            | 2.1              |
| O2    | 4c                | 7991(3) | 3748(3) | 6753(5)  | 9(1)            | 2.0              |
| O3    | 2a                | 5000    | 6713(4) | 10000    | 8(1)            | 2.0              |
| O4    | 4c                | 5673(3) | 2611(4) | 8933(6)  | 18(1)           | 0.6 <sup>a</sup> |
| O5    | 4c                | 5531(3) | 8245(3) | 7358(5)  | 7(1)            | 2.1              |
| O6    | 4c                | 8559(2) | 5262(5) | 14149(4) | 10(1)           | 2.0              |

<sup>a</sup> bond valence sum of O4 without hydrogen coordinates.

Table S3 Selected bond lengths (Å) and bond angles (deg.) for Sr<sub>2</sub>B<sub>5</sub>O<sub>9</sub>(OH) H<sub>2</sub>O<sup>a</sup>

|                                        |            |                                                        |              |
|----------------------------------------|------------|--------------------------------------------------------|--------------|
| Sr1–O6                                 | 2.555(2)   | O3 <sup>#7</sup> –B1–O5 <sup>#7</sup>                  | 111.0(3)     |
| Sr1–O4                                 | 2.563(3)   | O3 <sup>#7</sup> –B1–O2                                | 112.9(3)     |
| Sr1–O2                                 | 2.598(3)   | O5 <sup>#7</sup> –B1–O2                                | 110.4(4)     |
| Sr1–O4 <sup>#1</sup>                   | 2.599(3)   | O3 <sup>#7</sup> –B1–O1 <sup>#8</sup>                  | 105.2(4)     |
| Sr1–O5                                 | 2.635(3)   | O5 <sup>#7</sup> –B1–O1 <sup>#8</sup>                  | 105.2(3)     |
| Sr1–O5 <sup>#2</sup>                   | 2.684(3)   | O2–B1–O1 <sup>#8</sup>                                 | 111.7(3)     |
| Sr1–O1                                 | 2.697(3)   | O5 <sup>#3</sup> –B2–O5                                | 119.0(5)     |
| Sr1–O3                                 | 2.6971(16) | O5 <sup>#3</sup> –B2–O6 <sup>#1</sup>                  | 109.45(14)   |
| Sr1–O1 <sup>#3</sup>                   | 2.900(3)   | O5–B2–O6 <sup>#1</sup>                                 | 105.40(15)   |
| B1–O3 <sup>#7</sup>                    | 1.453(5)   | O5 <sup>#3</sup> –B2–O6 <sup>#9</sup>                  | 105.40(15)   |
| B1–O5 <sup>#7</sup>                    | 1.466(5)   | O5–B2–O6 <sup>#9</sup>                                 | 109.45(14)   |
| B1–O2                                  | 1.471(5)   | O6 <sup>#1</sup> –B2–O6 <sup>#9</sup>                  | 107.7(5)     |
| B1–O1 <sup>#8</sup>                    | 1.507(5)   | O1–B3–O6 <sup>#10</sup>                                | 123.2(5)     |
| B2–O5 <sup>#3</sup>                    | 1.446(4)   | O1–B3–O2                                               | 114.6(3)     |
| B2–O5                                  | 1.446(4)   | O6 <sup>#10</sup> –B3–O2                               | 122.1(4)     |
| B2–O6 <sup>#1</sup>                    | 1.508(5)   |                                                        |              |
| B2–O6 <sup>#9</sup>                    | 1.508(5)   |                                                        |              |
| B3–O1                                  | 1.350(6)   |                                                        |              |
| B3–O6 <sup>#10</sup>                   | 1.371(4)   |                                                        |              |
| B3–O2                                  | 1.383(6)   |                                                        |              |
| Geometrically estimated hydrogen bonds |            |                                                        |              |
| O4 <sup>#6</sup> .. H1 <sup>#5</sup>   | 1.2401(40) | O4 <sup>#6</sup> –H1 <sup>#5</sup> –O4 <sup>#7</sup>   | 179.778(216) |
| O4 <sup>#6</sup> .. O4 <sup>#7</sup>   | 2.4801(56) |                                                        |              |
| O4 <sup>#6</sup> .. H2 <sup>#10</sup>  | 0.8785(23) | O4 <sup>#6</sup> –H2 <sup>#10</sup> –O6 <sup>#11</sup> | 179.547(169) |
| O4 <sup>#6</sup> .. O6 <sup>#11</sup>  | 3.0697(36) |                                                        |              |
| Numerical refined hydrogen Bonds       |            |                                                        |              |
| O4 <sup>#6</sup> .. H1 <sup>#5</sup>   | 1.2219     | O4 <sup>#6</sup> –H1 <sup>#5</sup> –O4 <sup>#7</sup>   | 179.155      |
| O4 <sup>#6</sup> .. O4 <sup>#7</sup>   | 2.4437     |                                                        |              |
| O4 <sup>#6</sup> .. H2 <sup>#10</sup>  | 0.9716     | O4 <sup>#6</sup> –H2 <sup>#10</sup> –O6 <sup>#11</sup> | 150.653      |
| O4 <sup>#6</sup> .. O6 <sup>#11</sup>  | 3.1172     |                                                        |              |

<sup>a</sup> Symmetry transformations used to generate equivalent atoms:

#1  $-x+3/2, y+1/2, -z+2$ ; #2  $-x+3/2, y-1/2, -z+2$ ; #3  $-x+1, y, -z+1$ ; #4  $x-1/2, y+1/2, z$ ; #5  $x+1/2, y-1/2, z+1$ ; #6  $x, y, z+1$ ; #7  $x+1/2, y-1/2, z$ ; #8  $-x+3/2, y-1/2, -z+1$ ; #9  $x-1/2, y+1/2, z-1$ ; #10  $x, y, z-1$ ; #11  $-x+3/2, y+1/2, -z+1$ ; #12  $-x+1, y, -z+2$

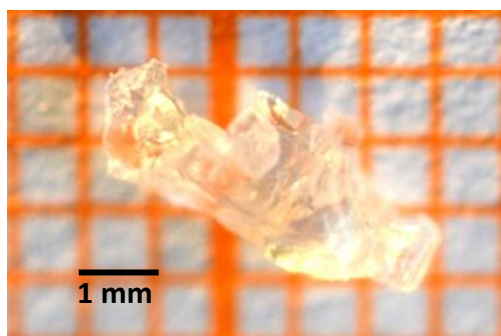

Fig. S1 Photograph of the Sr<sub>2</sub>B<sub>5</sub>O<sub>9</sub>(OH) · H<sub>2</sub>O crystal.

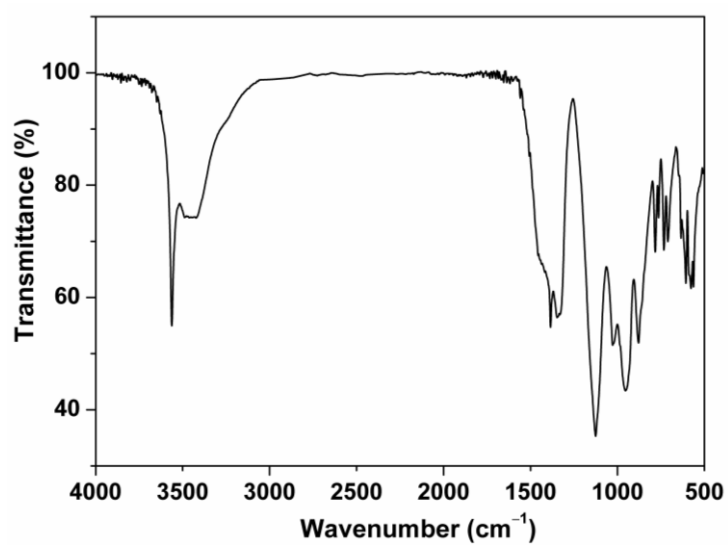

Fig. S2. IR spectrum of Sr<sub>2</sub>B<sub>5</sub>O<sub>9</sub>(OH) · H<sub>2</sub>O.

### The Mulliken analysis and electron densities

The chemical bond character can be clearly identified by Mulliken analysis<sup>4</sup> and electron density calculation, which, according to the reviewer's comment, have been carried out. Results have shown that Mulliken overlap populations of B-O and O-H bonds are 0.56 ~ 0.78 and 0.35 ~ 0.59, respectively, whereas those for Sr-O bonds are much smaller, i.e., 0.04 ~ 0.10. It indicates the covalency of the B-O and O-H bonds and ionicity of the Sr-O bonds, respectively. The chemical bond characters were further confirmed by electron densities of atoms which clearly show that the spherical electron distribution was found at strontium atoms, while the two-atom-sharing electron distribution was found in B-O bond and O-H bond (Fig. S3).

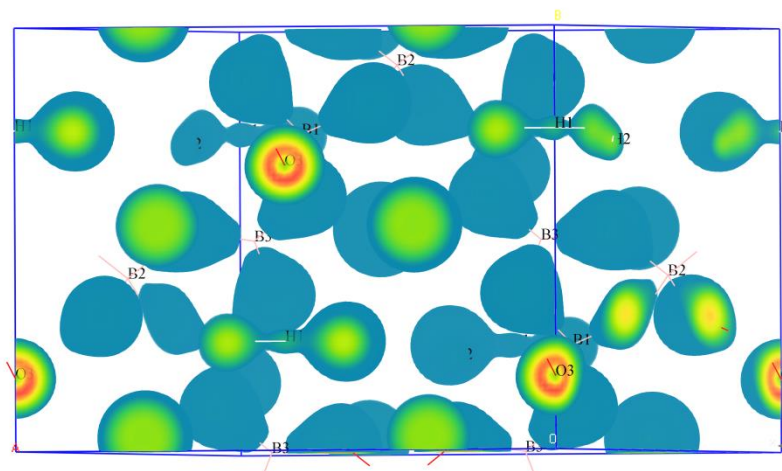

Fig. S3. Electron density of atoms in Sr<sub>2</sub>B<sub>5</sub>O<sub>9</sub>(OH)·H<sub>2</sub>O.

## References

1. SAINT, Version 7.60A, Bruker Analytical X-ray Instruments, Inc., Madison, WI, 2008.
2. G. Sheldrick, *Acta Crystallogr. A*, 2008, **64**, 112-122.
3. A. L. Spek, *J. Appl. Crystallogr.*, 2003, **36**, 7-13.
4. M. D. Segall, R. Shah, C. J. Pickard and M. C. Payne, *Phys. Rev. B* 1996, **54**, 16317-16320.
